# Supplementary material for: Adaptive wavelet packet transform for support vector machine modeling as globally optimized by particle swarm optimization algorithm
Source: Royal Society of Chemistry journal article supplement (doi:10.1039/c5ay00932d), 2015-01-01
Supplement: c5ay00932d1.pdf [file c5ay00932d1.pdf]

## Supporting Information

### **Adaptive Wavelet Packet Transform for Support Vector Machine Modeling as Globally Optimized by Particle Swarm Optimization Algorithm**

*Jin-Wen Zhang, Ji-Dong Wu, Li-Juan Tang<sup>\*</sup>, Jian-Hui Jiang, Guo-Li Shen, Ru-Qin Yu<sup>\*</sup>*

*State Key Laboratory for Chemo/Bio-Sensing and Chemometrics, College of  
Chemistry and Chemical Engineering, Hunan University, Changsha 410082, China*

*E-mail addresses: rqyu@hnu.edu.cn (R. Q. Yu), tanglijuan@hnu.edu.cn (L. J. Tang).*

**Table S1.** The parameters of Ad-WPT-SVMs obtained using PSO while modeling the content of protein, fat and moisture in meat, and the content of protein and moisture in corn.

| No. | Meat    |     |          | Corn    |          |
|-----|---------|-----|----------|---------|----------|
|     | Protein | Fat | Moisture | Protein | Moisture |
| 1   | 1       | 1   | 1        | 1       | 1        |
| 2   | 1       | 1   | 1        | 1       | 1        |
| 3   | 1       | 1   | 1        | 1       | 1        |
| 4   | 0       | 0   | 0        | 1       | 1        |
| 5   | 0       | 0   | 0        | 0       | 1        |
| 6   | 1       | 1   | 1        | 0       | 1        |
| 7   | 0       | 1   | 1        | 1       | 0        |
| 8   | 1       | 0   | 1        | 1       | 1        |
| 9   | 1       | 1   | 0        | 1       | 1        |
| 10  | 1       | 0   | 1        | 1       | 1        |
| 11  | 1       | 1   | 1        | 0       | 1        |
| 12  | 1       | 1   | 1        | 1       | 1        |
| 13  | 0       | 0   | 1        | 0       | 0        |
| 14  | 0       | 1   | 0        | 1       | 1        |
| 15  | 0       | 1   | 1        | 1       | 0        |
| 16  | 0       | 0   | 1        | 1       | 0        |
| 17  | 1       | 1   | 1        | 1       | 1        |
| 18  | 1       | 1   | 1        | 0       | 0        |
| 19  | 1       | 0   | 1        | 1       | 1        |
| 20  | Coding  | 1   | 0        | 1       | 0        |
| 21  |         | 0   | 1        | 0       | 1        |
| 22  |         | 1   | 0        | 0       | 0        |
| 23  |         | 1   | 1        | 0       | 1        |
| 24  |         | 1   | 0        | 1       | 1        |
| 25  |         | 1   | 1        | 0       | 1        |
| 26  |         | 0   | 1        | 0       | 1        |
| 27  |         | 1   | 0        | 0       | 1        |
| 28  |         | 1   | 0        | 1       | 0        |
| 29  |         | 0   | 1        | 1       | 1        |
| 30  |         | 1   | 1        | 0       | 0        |
| 31  |         | 1   | 1        | 1       | 0        |
| 32  |         | 1   | 0        | 0       | 0        |
| 33  |         | 1   | 1        | 1       | 1        |
| 34  |         | 1   | 1        | 1       | 1        |
| 35  |         | 1   | 0        | 0       | 1        |
| 36  |         | 1   | 1        | 1       | 1        |
| 37  |         | 1   | 0        | 1       | 0        |
| 38  |         | 0   | 0        | 1       | 0        |

| No. | Meat    |     |          | Corn    |          |
|-----|---------|-----|----------|---------|----------|
|     | Protein | Fat | Moisture | Protein | Moisture |
| 39  | 0       | 0   | 1        | 0       | 1        |
| 40  | 0       | 0   | 0        | 1       | 0        |
| 41  | 0       | 1   | 1        | 0       | 0        |
| 42  | 1       | 1   | 1        | 1       | 1        |
| 43  | 1       | 1   | 0        | 1       | 1        |
| 44  | 1       | 1   | 0        | 1       | 0        |
| 45  | 0       | 0   | 0        | 1       | 0        |
| 46  | 1       | 1   | 1        | 1       | 1        |
| 47  | 1       | 0   | 1        | 0       | 1        |
| 48  | 0       | 0   | 0        | 1       | 0        |
| 49  | 1       | 0   | 0        | 0       | 0        |
| 50  | 1       | 1   | 1        | 1       | 1        |
| 51  | 1       | 0   | 0        | 1       | 1        |
| 52  | 0       | 1   | 1        | 1       | 0        |
| 53  | 0       | 0   | 1        | 1       | 0        |
| 54  | 0       | 0   | 1        | 1       | 0        |
| 55  | 1       | 1   | 0        | 1       | 0        |
| 56  | 1       | 1   | 0        | 1       | 0        |
| 57  | 1       | 1   | 1        | 0       | 1        |
| 58  | 0       | 1   | 1        | 1       | 1        |
| 59  | 1       | 0   | 1        | 1       | 1        |
| 60  | 1       | 1   | 1        | 0       | 0        |
| 61  | 1       | 0   | 1        | 0       | 1        |
| 62  | 1       | 1   | 1        | 0       | 1        |
| 63  | 1       | 0   | 1        | 1       | 0        |
| 64  | 0       | 0   | 1        | 0       | 1        |
| 65  | 1       | 1   | 1        | 1       | 1        |
| 66  | 1       | 1   | 1        | 1       | 1        |
| 67  | 1       | 0   | 0        | 0       | 0        |
| 68  | 1       | 1   | 1        | 1       | 1        |
| 69  | 0       | 1   | 1        | 1       | 0        |
| 70  | 1       | 1   | 1        | 0       | 0        |
| 71  | 1       | 1   | 0        | 1       | 1        |
| 72  | 1       | 1   | 1        | 1       | 1        |
| 73  | 1       | 0   | 1        | 0       | 0        |
| 74  | 0       | 1   | 1        | 0       | 1        |
| 75  | 0       | 0   | 1        | 0       | 1        |
| 76  | 1       | 1   | 1        | 1       | 0        |
| 77  | 1       | 0   | 1        | 1       | 1        |
| 78  | 1       | 0   | 1        | 1       | 1        |
| 79  | 1       | 1   | 1        | 0       | 1        |

| No. | Meat    |     |          | Corn    |          |
|-----|---------|-----|----------|---------|----------|
|     | Protein | Fat | Moisture | Protein | Moisture |
| 80  | 1       | 0   | 1        | 1       | 0        |
| 81  | 1       | 1   | 0        | 0       | 1        |
| 82  | 0       | 0   | 1        | 1       | 1        |
| 83  | 1       | 1   | 1        | 0       | 1        |
| 84  | 0       | 0   | 1        | 0       | 1        |
| 85  | 1       | 1   | 0        | 0       | 1        |
| 86  | 1       | 1   | 1        | 0       | 1        |
| 87  | 1       | 1   | 1        | 0       | 1        |
| 88  | 1       | 0   | 1        | 0       | 0        |
| 89  | 0       | 0   | 1        | 0       | 1        |
| 90  | 1       | 1   | 1        | 0       | 1        |
| 91  | 0       | 1   | 0        | 1       | 0        |
| 92  | 1       | 1   | 1        | 0       | 1        |
| 93  | 1       | 0   | 1        | 0       | 1        |
| 94  | 1       | 1   | 1        | 1       | 0        |
| 95  | 1       | 1   | 1        | 1       | 1        |
| 96  | 1       | 1   | 1        | 0       | 0        |
| 97  | 1       | 1   | 1        | 0       | 1        |
| 98  | 0       | 1   | 0        | 1       | 1        |
| 99  | 1       | 1   | 1        | 0       | 1        |
| 100 | 0       | 0   | 1        | 0       | 0        |
| 101 | 1       | 0   | 1        | 1       | 1        |
| 102 | 1       | 1   | 1        | 0       | 1        |
| 103 | 1       | 1   | 1        | 1       | 1        |
| 104 | 0       | 1   | 0        | 0       | 1        |
| 105 | 0       | 1   | 1        | 1       | 0        |
| 106 | 1       | 1   | 0        | 0       | 0        |
| 107 | 1       | 1   | 1        | 0       | 1        |
| 108 | 1       | 1   | 1        | 1       | 1        |
| 109 | 0       | 1   | 0        | 1       | 1        |
| 110 | 0       | 1   | 1        | 0       | 0        |
| 111 | 0       | 1   | 0        | 1       | 1        |
| 112 | 0       | 1   | 1        | 1       | 0        |
| 113 | 1       | 1   | 1        | 0       | 1        |
| 114 | 1       | 0   | 1        | 1       | 1        |
| 115 | 1       | 0   | 1        | 1       | 0        |
| 116 | 0       | 1   | 1        | 1       | 0        |
| 117 | 0       | 0   | 0        | 0       | 0        |
| 118 | 0       | 0   | 0        | 1       | 1        |
| 119 | 1       | 1   | 1        | 1       | 1        |
| 120 | 1       | 1   | 1        | 1       | 1        |

| No. |               | Meat    |          |          | Corn     |          |
|-----|---------------|---------|----------|----------|----------|----------|
|     |               | Protein | Fat      | Moisture | Protein  | Moisture |
| 121 |               | 1       | 0        | 1        | 1        | 1        |
| 122 |               | 1       | 1        | 1        | 1        | 1        |
| 123 |               | 0       | 0        | 1        | 1        | 0        |
| 124 |               | 0       | 1        | 1        | 1        | 0        |
| 125 |               | 1       | 1        | 1        | 1        | 1        |
| 126 |               | 0       | 1        | 0        | 0        | 0        |
| 127 |               | 0       | 1        | 1        | 0        | 1        |
| 128 | $\sigma$      | 1.38    | 1.25     | 1.38     | 1.86     | 04.92E-3 |
| 129 | $C$           | 3.83E+2 | 9.34E+3  | 2.09E+3  | 4.28 E+5 | 7.44E+2  |
| 130 | $\varepsilon$ | 1.23E-2 | 1.40E-22 | 2.42E-2  | 0.59     | 0.02     |

note: Coding represents for the PSO optimized coding sequence of WPT tree in each Ad-WPT-SVM; “0” in the coding part implied that the corresponding node does not exist and “1” meant the existence of the corresponding node; Number in the first column from 1 to 127 represents for the sequence of a node as schemed in Figure 2;  $\sigma$  represents for the optimized kernel width,  $C$  for penalty constant  $C$  and  $\varepsilon$  for tolerance zone.

**Table S2.** The  $R$ -square score ( $R^2$ ) of each model for the content analysis of protein, fat and moisture in meat.

|             | Protein |         | Fat     |         | Moisture |         |
|-------------|---------|---------|---------|---------|----------|---------|
|             | Cal set | Pre set | Cal set | Pre set | Cal set  | Pre set |
| PLS         | 0.9247  | 0.9326  | 0.9763  | 0.9835  | 0.9857   | 0.9851  |
| BPNN        | 0.7866  | 0.8470  | 0.9187  | 0.9314  | 0.9078   | 0.9423  |
| WPT-SVM     | 0.9390  | 0.9270  | 0.9882  | 0.9868  | 0.9874   | 0.9859  |
| Ad- WPT-SVM | 0.9580  | 0.9446  | 0.9992  | 0.9986  | 0.9946   | 0.9936  |

note: RMSE represents for root mean square error; Cal set represents for calibration set and Pre set for prediction set.

**Table S3.** The  $R$ -square score ( $R^2$ ) of each model for the content analysis of protein and moisture in corn.

|            | Protein |         | Moisture |         |
|------------|---------|---------|----------|---------|
|            | Cal set | Pre set | Cal set  | Pre set |
| PLS        | 0.9904  | 0.9870  | 0.9380   | 0.9598  |
| BPNN       | 0.9212  | 0.9229  | 0.8681   | 0.8638  |
| WPT-SVM    | 0.9990  | 0.9990  | 0.9704   | 0.9483  |
| Ad-WPT-SVM | 0.9998  | 0.9996  | 0.9998   | 0.9998  |

note: RMSE represents for root mean square error; Cal set represents for calibration set and Pre set for prediction set.
